# Supplementary material for: Switching the recognition preference of thiourea derivative by replacing Cu2+: spectroscopic characteristics of aggregation-induced emission and mechanism studies for recognition of Hg(ii) in aqueous solution
Source: Royal Society of Chemistry journal article supplement (doi:10.1039/c4ay02916j), 2015-01-01
Supplement: c4ay02916j1.pdf [file c4ay02916j1.pdf]

# Switching the recognition preference of thiourea derivative by replacing Cu<sup>2+</sup>: Spectroscopic characteristic of aggregation-induced emission and the mechanism studies for recognition of Hg(II) in aqueous solution

Aizhi Wang, Yunxu Yang \*, Feifei Yu, Lingwei Xue, Biwei Hu, Yajun Dong,  
Weiping Fan

Department of Chemistry and Chemical Engineering, School of Chemistry and Biological  
Engineering, University of Science and Technology Beijing,  
Beijing 100083, China

## Contents

|                                                                                                                                                                                                                                                                                                        |    |
|--------------------------------------------------------------------------------------------------------------------------------------------------------------------------------------------------------------------------------------------------------------------------------------------------------|----|
| <b>Figure. S1</b> The <sup>1</sup> H NMR spectrum of CN-S. ....                                                                                                                                                                                                                                        | 3  |
| <b>Figure. S2</b> The <sup>13</sup> C NMR spectrum of CN-S. ....                                                                                                                                                                                                                                       | 4  |
| <b>Figure. S3</b> The mass spectrum of CN-S. ....                                                                                                                                                                                                                                                      | 5  |
| <b>Table S1</b> The detailed information of the certified reference material of standard solution of Hg <sup>2+</sup> .....                                                                                                                                                                            | 6  |
| <b>Figure S4.</b> A plot of the fluorescence intensity obtained from the reaction of CN-S (10 μM) with Cu <sup>2+</sup> (1.5 equiv.). All measurements were taken in 50 mM PBS buffer at pH 7.0 (containing 0.1% DMSO) at 25 °C. Excitation and emission were at 380 nm/470 nm. ....                   | 7  |
| <b>Figure. S5</b> Fluorescence spectra of CN-S (10 μM), CN-S (10 μM) + Cu <sup>2+</sup> (1.0 equiv.) and CN-S (10 μM)+Cu <sup>2+</sup> (1.0equiv.)+EDTA (5.0 equiv.) All measurements were taken in 50 mM PBS buffer at pH 7.0 (containing 0.1% DMSO) at 25 °C. Excitation wavelength was 380 nm. .... | 8  |
| <b>Figure. S6</b> Optimized structure and molecular amplitude plots HOMO and LUMO of CN-S and CN-O. ....                                                                                                                                                                                               | 9  |
| <b>Figure. S7</b> Absorption spectra of CN-S (5 μM) and CN-O (5 μM) in DMSO. ....                                                                                                                                                                                                                      | 10 |
| <b>Figure. S8</b> Optimized structure and some useful data of Cu-CN-S .....                                                                                                                                                                                                                            | 11 |
| <b>Figure S9</b> SEM images of CN-S in aqueous solution (containing 0.1% DMSO) in the absence (A) and presence (B) of 1.0 equiv. Cu <sup>2+</sup> ions. ....                                                                                                                                           | 12 |
| <b>Detection limit</b> .....                                                                                                                                                                                                                                                                           | 13 |
| <b>Separate of CN-O</b> .....                                                                                                                                                                                                                                                                          | 14 |
| <b>Figure. S12</b> The mass spectrum of the reacting system of Cu-CN-S with Hg <sup>2+</sup> .....                                                                                                                                                                                                     | 15 |

**Figure S13** SEM images of **CN-O** in aqueous solution (containing 0.1% DMSO). .....16

**Figure. S14** Fluorescent spectra of **CN-O** (10  $\mu$ M) in a DMSO/water mixture (excitation wavelength was 380 nm). .....17

**Figure. S15** Effect of water volume fraction on the emission intensity of **CN-O** (10  $\mu$ M) in DMSO/water containing 50 mM PBS at pH 7.0. Inset show photographs of **CN-O** (10  $\mu$ M) in dilute DMSO solution and a DMSO/water mixture with a high water fraction under a UV lamp (365 nm). Excitation and emission was at 380nm/470nm respectively. ....18

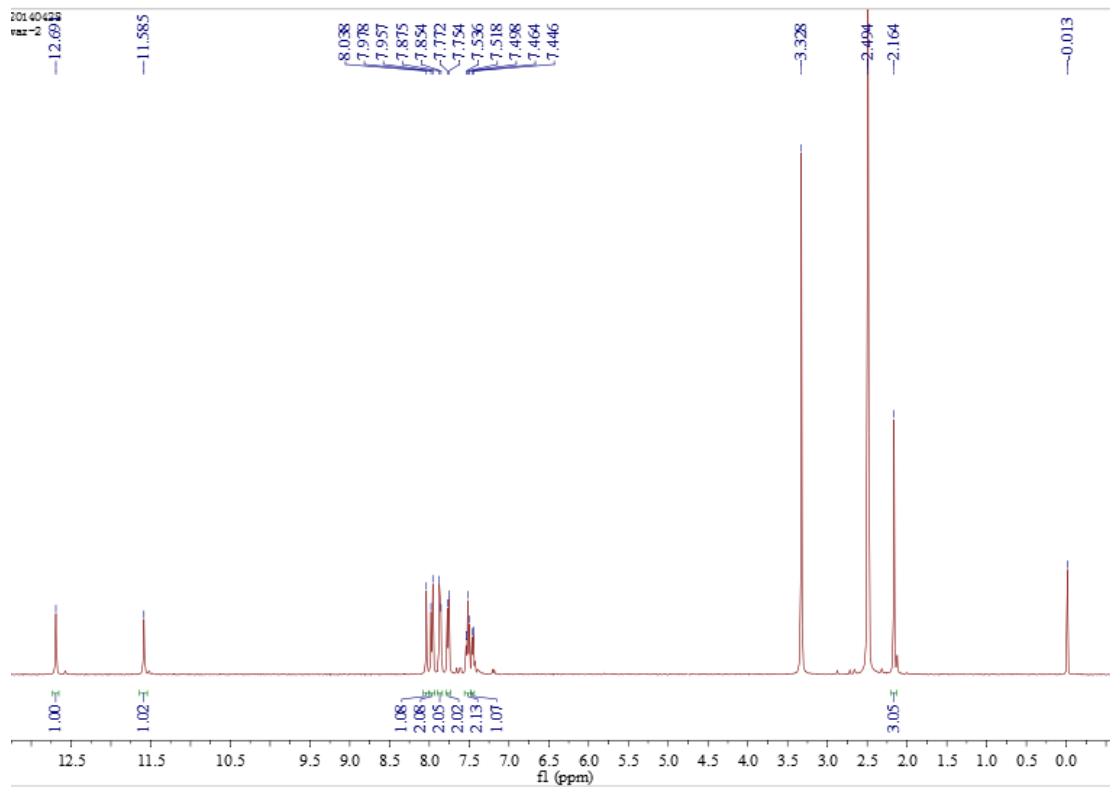

**Figure. S1** The <sup>1</sup>H NMR spectrum of CN-S.

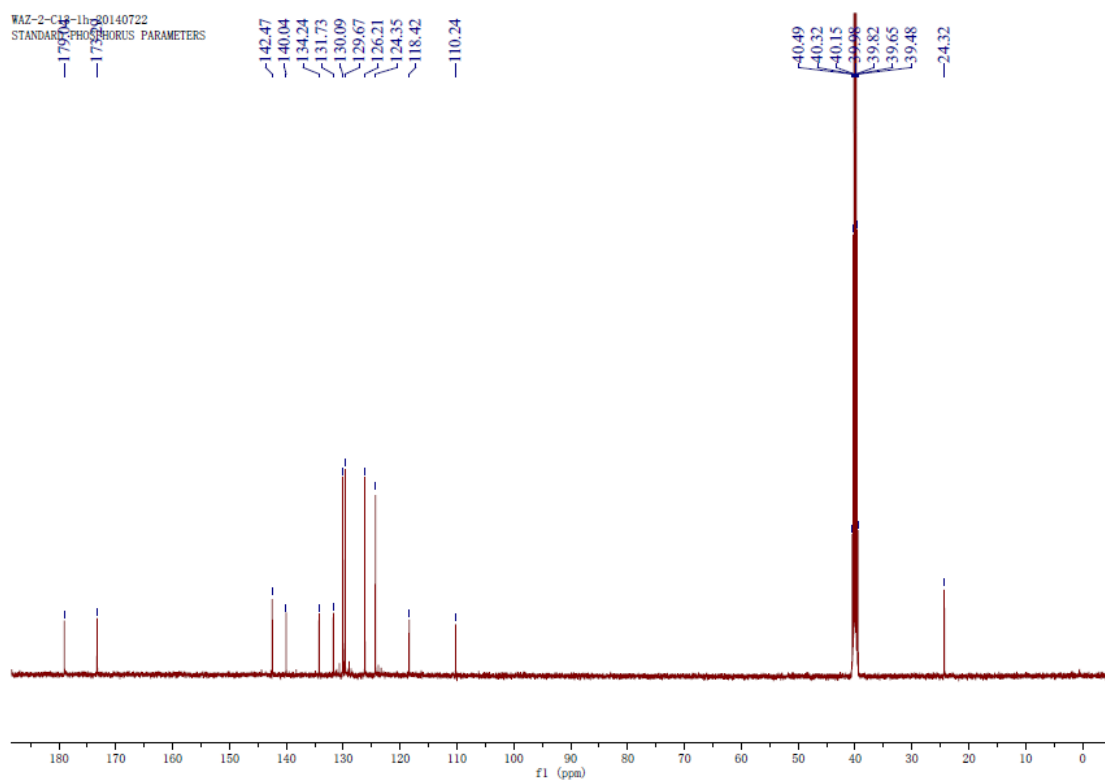

**Figure. S2** The  $^{13}\text{C}$  NMR spectrum of CN-S.

5 #477-498 RT: 0.88-0.92 AV: 22 SB: 444 0.39-0.72 , 1.37-1.87 NL: 6.48E5  
Γ: ITMS + c ESI Full ms [50.00-500.00]

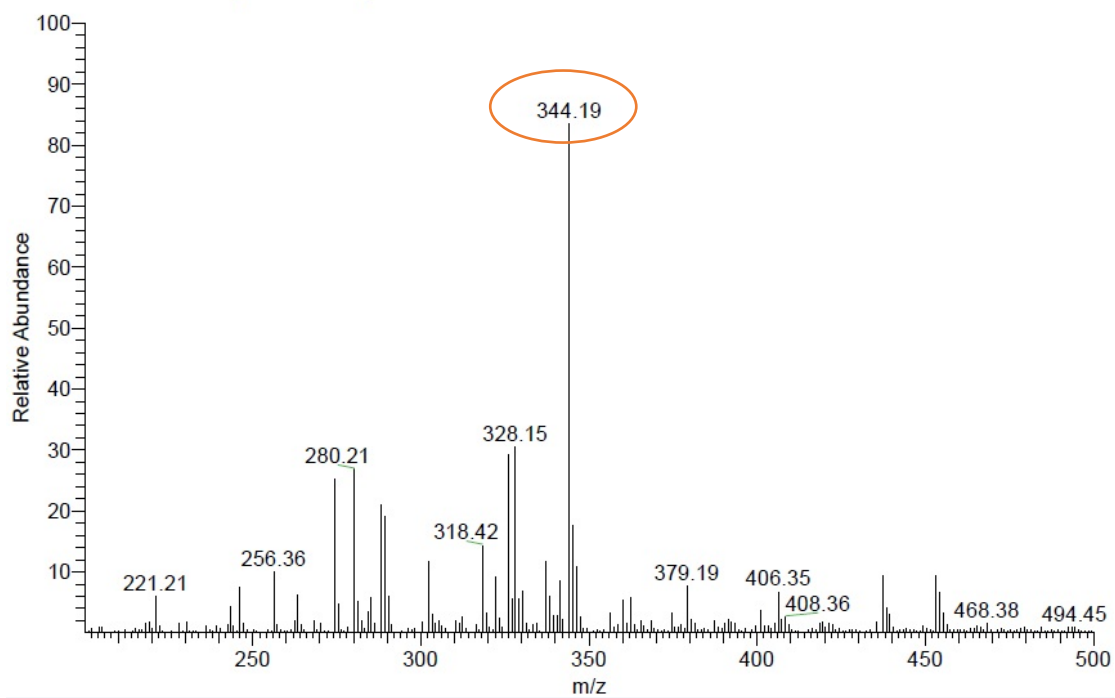

**Figure. S3** The mass spectrum of CN-S.

**Table S1** The detailed information of the certified reference material of standard solution of  $\text{Hg}^{2+}$

| standard  | Unique         | Ingredients | Mass                    | Medium         | Medium             | relative    |
|-----------|----------------|-------------|-------------------------|----------------|--------------------|-------------|
| sample    | Identification |             | Concentration           |                | concentration      | expanded    |
| number    |                |             | $\rho/(\mu\text{g/ml})$ |                | $c/(\text{mol/L})$ | uncertainty |
|           |                |             |                         |                |                    | $U/\%(k=2)$ |
| GSB       | 04- 148029-1   | Hg          | 1000                    | $\text{HNO}_3$ | 1.0                | 0.7         |
| 1729-2004 |                |             |                         |                |                    |             |

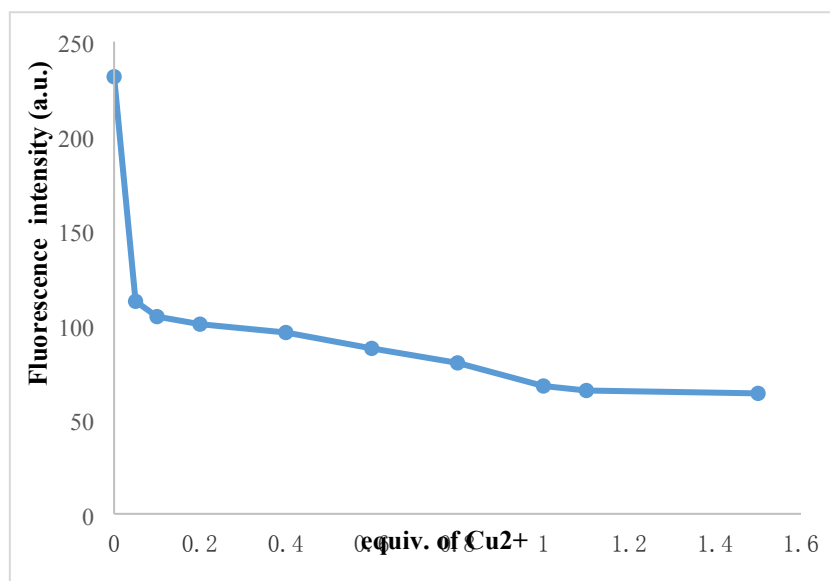

**Figure S4.** A plot of the fluorescence intensity obtained from the reaction of **CN-S** (10  $\mu\text{M}$ ) with  $\text{Cu}^{2+}$  (1.5 equiv.). All measurements were taken in 50 mM PBS buffer at pH 7.0 (containing 0.1% DMSO) at 25°C. Excitation and emission were at 380 nm/470 nm.

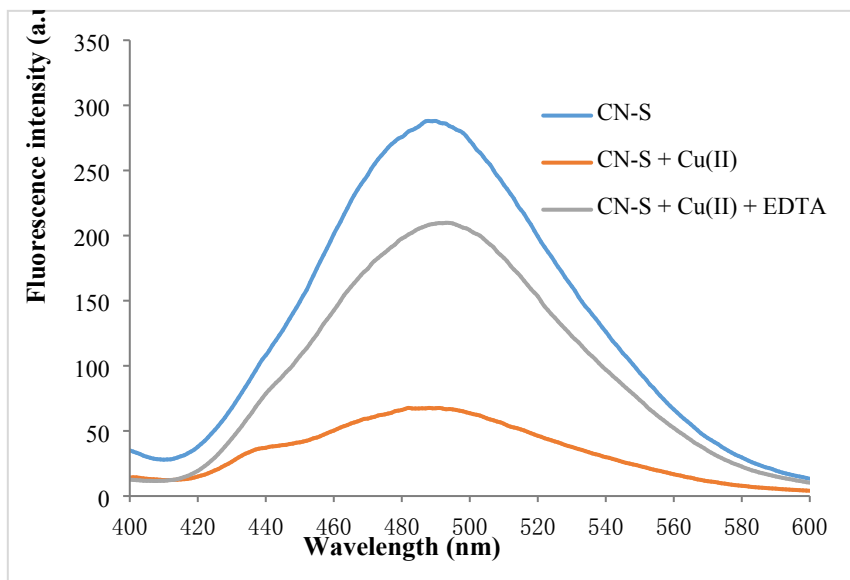

**Figure. S5** Fluorescence spectra of **CN-S** (10  $\mu\text{M}$ ), **CN-S** (10  $\mu\text{M}$ ) +  $\text{Cu}^{2+}$  (1.0 equiv.) and **CN-S** (10  $\mu\text{M}$ ) +  $\text{Cu}^{2+}$  (1.0 equiv.) + EDTA (5.0 equiv.) All measurements were taken in 50 mM PBS buffer at pH 7.0 (containing 0.1% DMSO) at 25°C. Excitation wavelength was 380 nm.



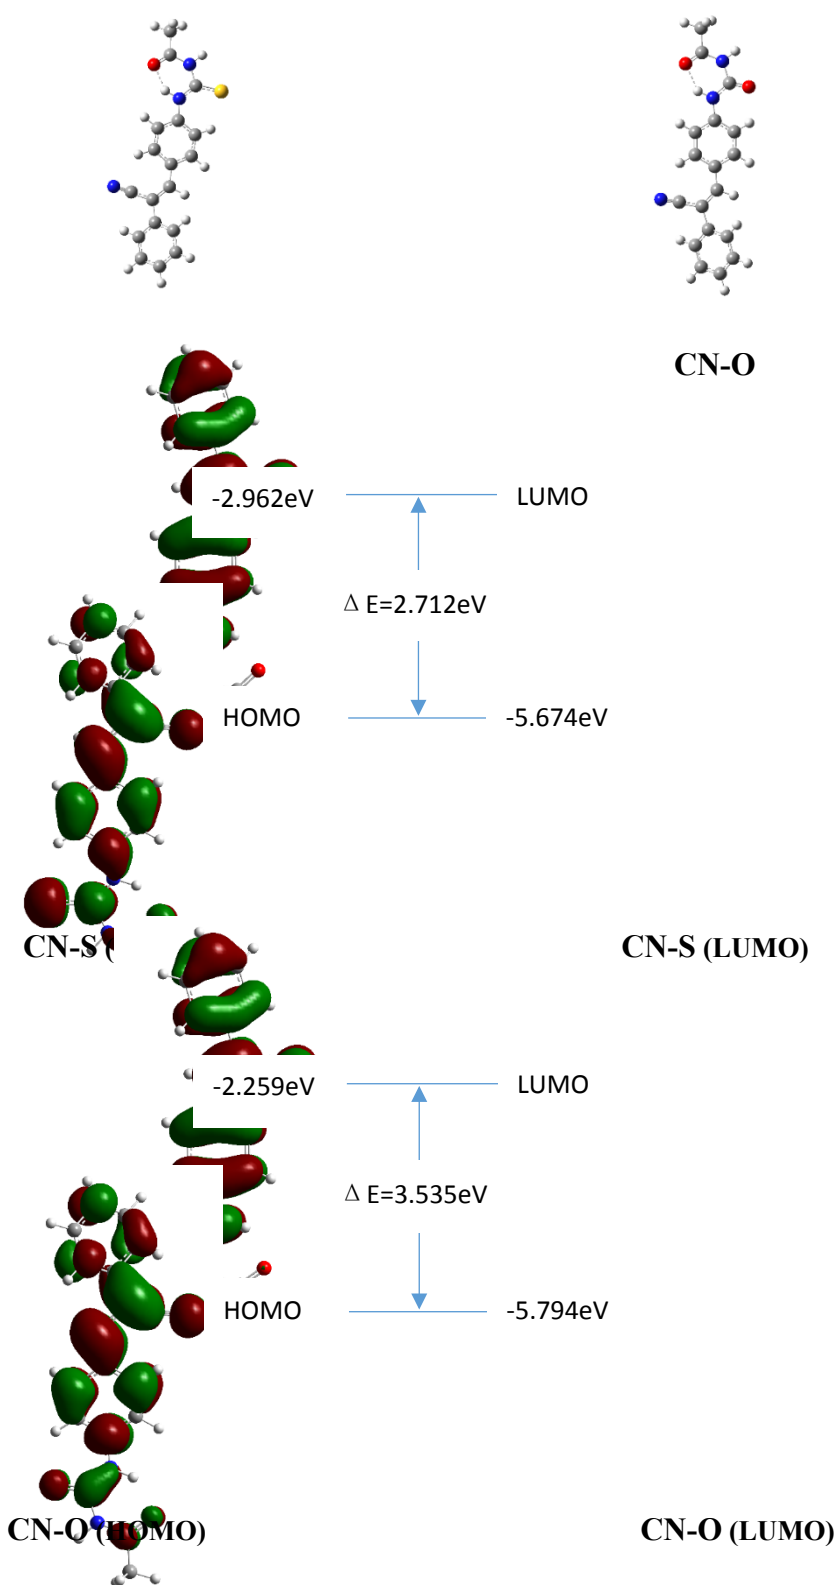

**Figure. S6** Optimized structure and molecular amplitude plots HOMO and LUMO of CN-S and CN-O.

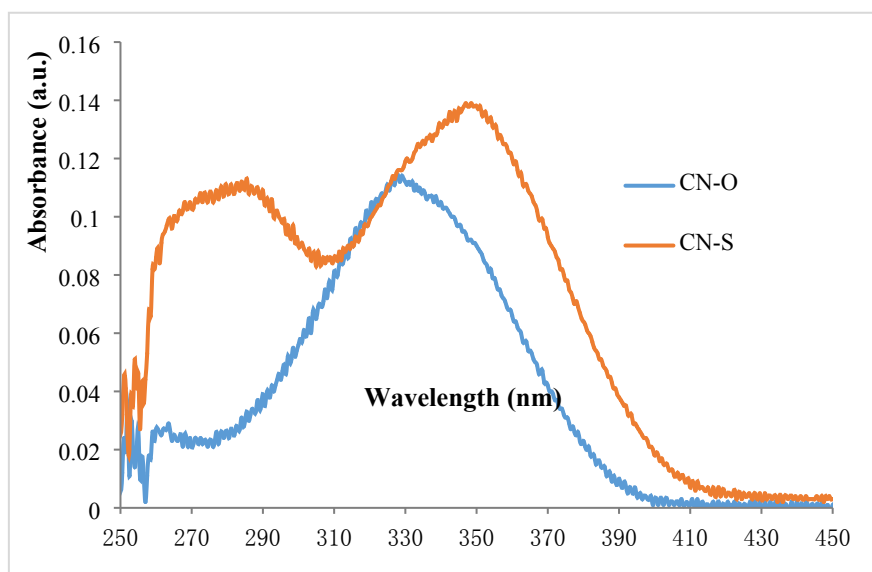

**Figure. S7** Absorption spectra of **CN-S** ( $5 \mu\text{M}$ ) and **CN-O** ( $5 \mu\text{M}$ ) in DMSO.

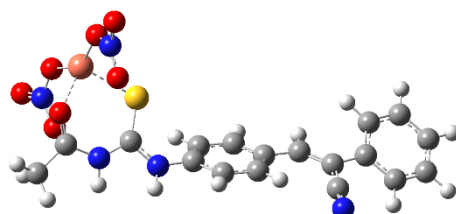

HF=-2089.35354314

Enthalpy= 0.360190 a.u.= 9.80113009 eV;

Gibbs Free Energy= 0.254515 a.u.= 6.925607665 eV;

Zero-point correction= 0.327241 a.u.= 8.904554851 eV.

d(Cu-S)=2.431Å

d(Cu-O)=2.153Å

**Figure. S8** Optimized structure and some useful data of **Cu-CN-S**

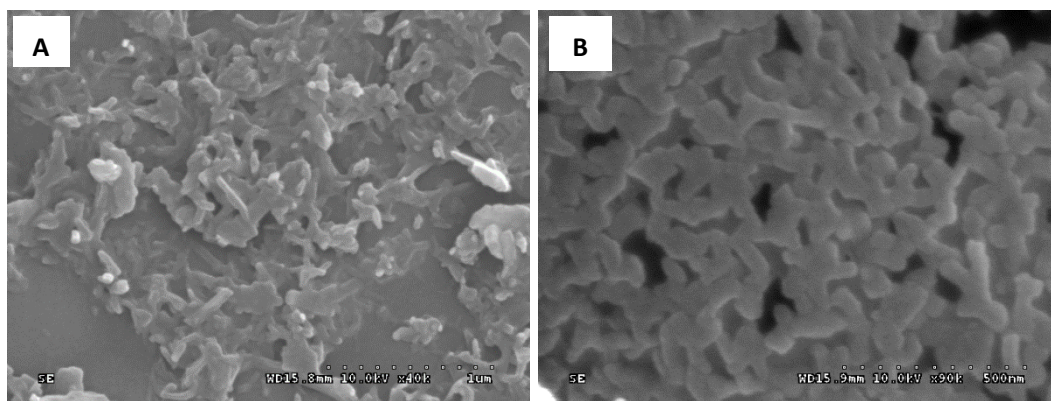

**Figure S9** SEM images of CN-S in aqueous solution (containing 0.1% DMSO) in the absence (A) and presence (B) of 1.0 equiv.  $\text{Cu}^{2+}$  ions.

## Detection limit

The detection limit for  $\text{Hg}^{2+}$  ions was calculated by the fluorescence titration experiments according to the reported method. A good linear relationship between the fluorescence intensity and  $\text{Hg}^{2+}$  concentration could be obtained in the 0~10  $\mu\text{M}$  ( $R^2=0.9966$ ). The value obtained for the  $\text{Hg}^{2+}$  was found to be 45 nM by the equation of  $L_{\text{OD}}=3\delta/m$  ( $\delta$  was the standard deviation of the blank solution and  $m$  is the Absolute value of the slope between intensity versus  $\text{Hg}^{2+}$  concentration).

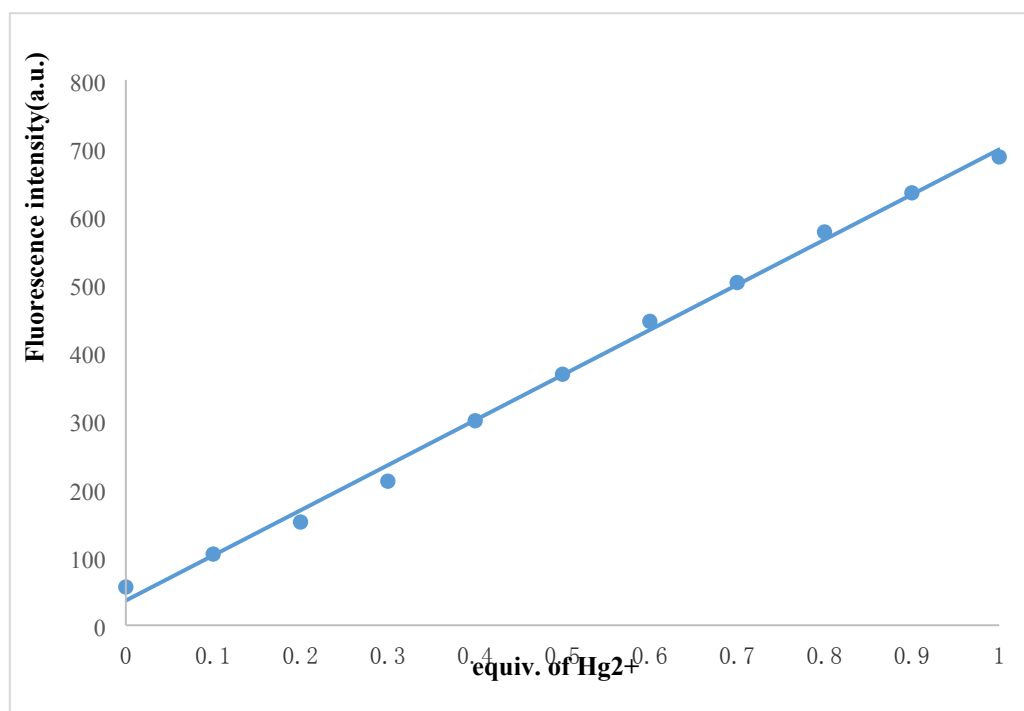

Figure. S10 The relationship between the fluorescence intensity and  $\text{Hg}^{2+}$  concentration. All measurements were taken in 50 mM PBS buffer at pH 7.0 (containing 0.1% DMSO) at 25°C. Excitation and emission were at 380 nm/470 nm.

## Separate of CN-O

To a solution of CN-S (30 mg, 0.1mmol) and Copper nitrate trihydrate (24.1mg, 0.1 mmol) in dimethylsulfoxide (2.16 mL) was added a solution of mercury(II) chlorid (54.2mg, 0.2mmol) in water (27 mL) at rt. After stirring for 1 h, The mixture was then extracted with  $\text{CHCl}_3$  and the organic layer was washed with water, dried over  $\text{Na}_2\text{SO}_4$ , and then filtered out. Excess solvent was evaporated under reduced pressure to afford CN-O.

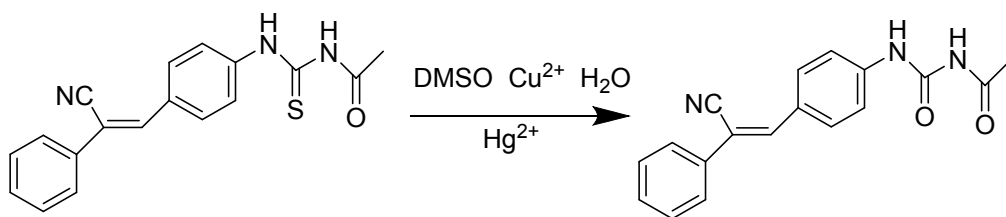

Figure S11. Separate of CN-O

0 #37-43 RT: 0.07-0.08 AV: 7 SB: 16 0.04-0.06 , 0.11-0.12 NL: 1.35E5  
ITMS + c ESI Full ms [50.00-600.00]

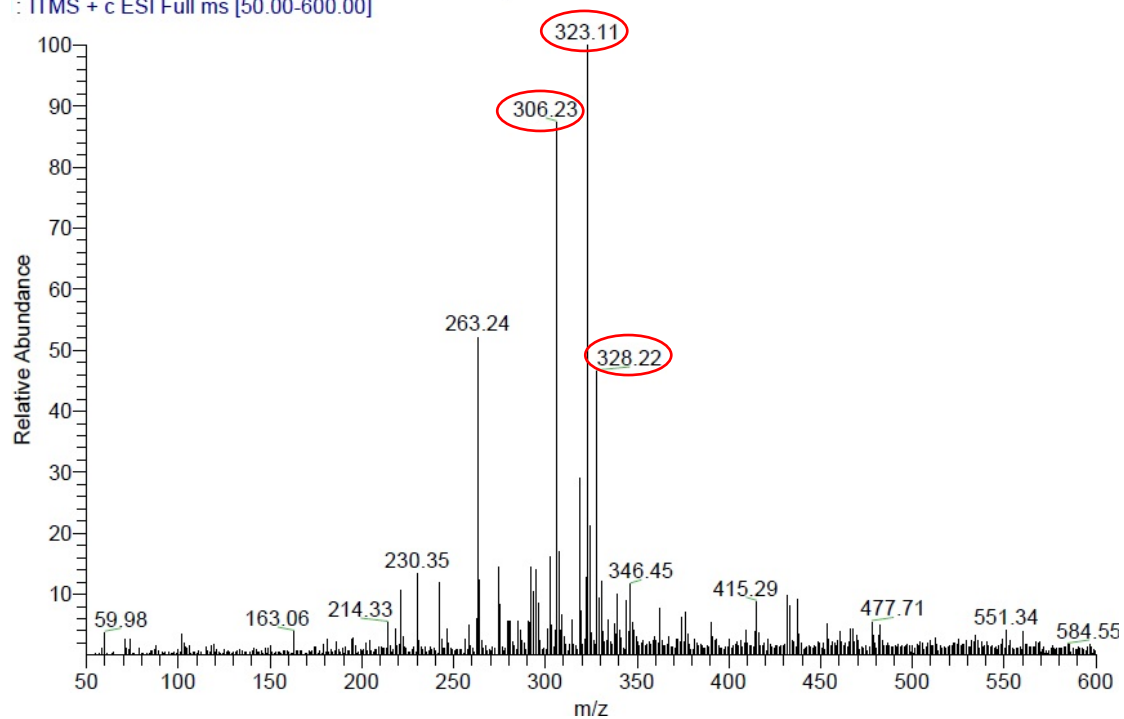

**Figure. S12** The mass spectrum of the reacting system of Cu-CN-S with Hg<sup>2+</sup>.

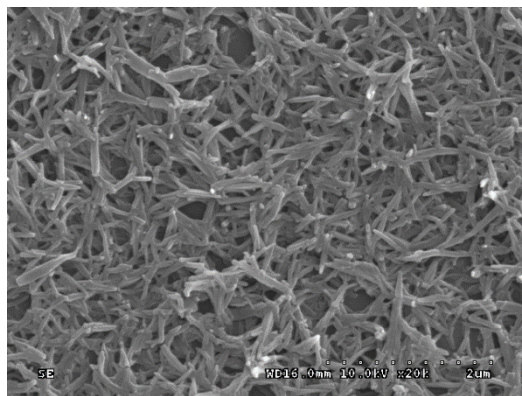

**Figure S13** SEM images of CN-O in aqueous solution (containing 0.1% DMSO).



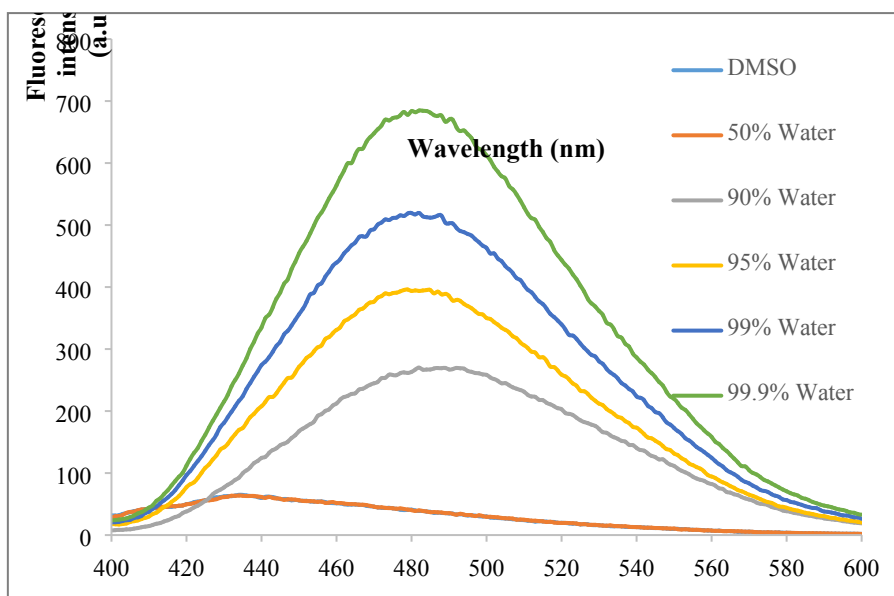

**Figure. S14** Fluorescent spectra of CN-O (10 μM) in a DMSO/water mixture (excitation wavelength was 380 nm).

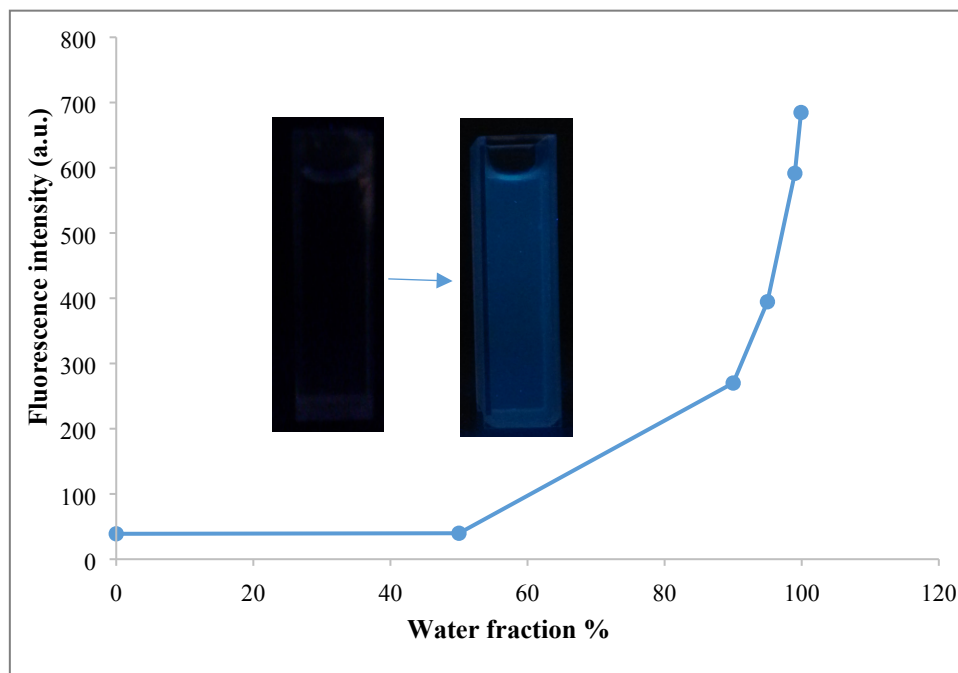

**Figure. S15** Effect of water volume fraction on the emission intensity of **CN-O** ( $10 \mu\text{M}$ ) in DMSO/water containing 50 mM PBS at pH 7.0. Inset show photographs of **CN-O** ( $10 \mu\text{M}$ ) in dilute DMSO solution and a DMSO/water mixture with a high water fraction under a UV lamp (365 nm). Excitation and emission was at 380nm/470nm respectively.
